# Supplementary material
Source: PubMed Central journal article supplement (PMC2943767)

## Supplementary Appendix

This appendix has been provided by the authors to give readers additional information about their work.

Supplement to: Ang KK, Harris J, Wheeler R, et al. Human papillomavirus and survival of patients with oropharyngeal cancer. *N Engl J Med* 2010;363:24-35. DOI: 10.1056/NEJMoa0912217.

Supplemental Figure 1 is the CONSORT diagram for RTOG 0129; 361 of 372 (97%) and 360 of 371 (97%) patients from the SFX and AFX-C treatment arms, respectively, were included in analysis. On the SFX arm, only one patient included in analysis did not receive both radiation therapy and chemotherapy, compared to 6 on the AFX-C arm.

Supplemental Table 1 shows patient and tumor characteristics for oropharynx patients with and without HPV determination. In Supplemental Figure 2, Kaplan-Meier estimates for overall survival (top) and progression-free survival (bottom) are presented for oropharynx patients with and without HPV determination. No statistically significant differences were detected for baseline characteristics or outcome.

Supplemental Figure 3 shows representative cases of oropharynx cancer positive by HPV16 *in situ* hybridization and p16 immunohistochemistry. Panels show HPV16 *in situ* hybridization (A and C) and p16 (B and D) immunohistochemistry results for representative cases of HPV16-positive, invasive squamous cell carcinoma. HPV16 is visualized as multiple (Panel A) or single (Panel C) punctuate brown signals per tumor cell nucleus. Panel insets demonstrate positive controls performed in all assays derived from cell lines with ~ 500 (CaSki, inset Panel A) or 2 integrated copies of HPV16 (SiHa, inset Panel C). Strong and diffuse nuclear and cytoplasmic brown staining for p16 is specific to tumor cells (Panels B and D).

Supplemental Table 2 shows treatment delivery by assigned treatment and by HPV status. Compliance to prescribed radiation therapy was excellent for both arms. For patients assigned to the AFX-C arm, 91.1% received at least 10 of 12 planned BID fractionation days. Compliance to prescribed chemotherapy was better on the AFX-C arm with 87.8% receiving both cycles compared to 69.0% receiving all 3 cycles on the SFX arm. Treatment compliance was similar for HPV positive and negative patients.

Supplemental Table 3 shows toxicity and feeding tube use by assigned treatment. There were no differences detected for death within 30 days or for Grade 5 toxicity. Patients on the SFX arm had more Grade 3-4 hematologic toxicity (39.6% vs. 30.8%) and Grade 3-4 metabolic/laboratory toxicity (23.0% vs. 16.7%). Patients on the AFX-C arm had more late Grade 3-4 mucositis, but the overall incidence was very low for both arms (1.4% and 4.1%). Two-thirds of patients on each arm required a feeding tube at the end of treatment (68.7% and 67.1%) and approximately 10% still required a tube at 3 years from the start of treatment (8.3% and 10.1%).

Supplemental Table 4 shows all time-to-failure endpoints in addition to cause of death and site of first failure by assigned treatment. In Supplemental Figure 4, Kaplan-Meier estimates are presented for overall and progression-free survival, and cumulative incidence estimates for local-regional failure and distant metastasis, by assigned treatment. We detected no differences in overall survival (top left), progression-free survival (top right), local-regional failure (bottom left), or distant metastasis (bottom right) between the treatment arms.

### Supplemental Figure 1

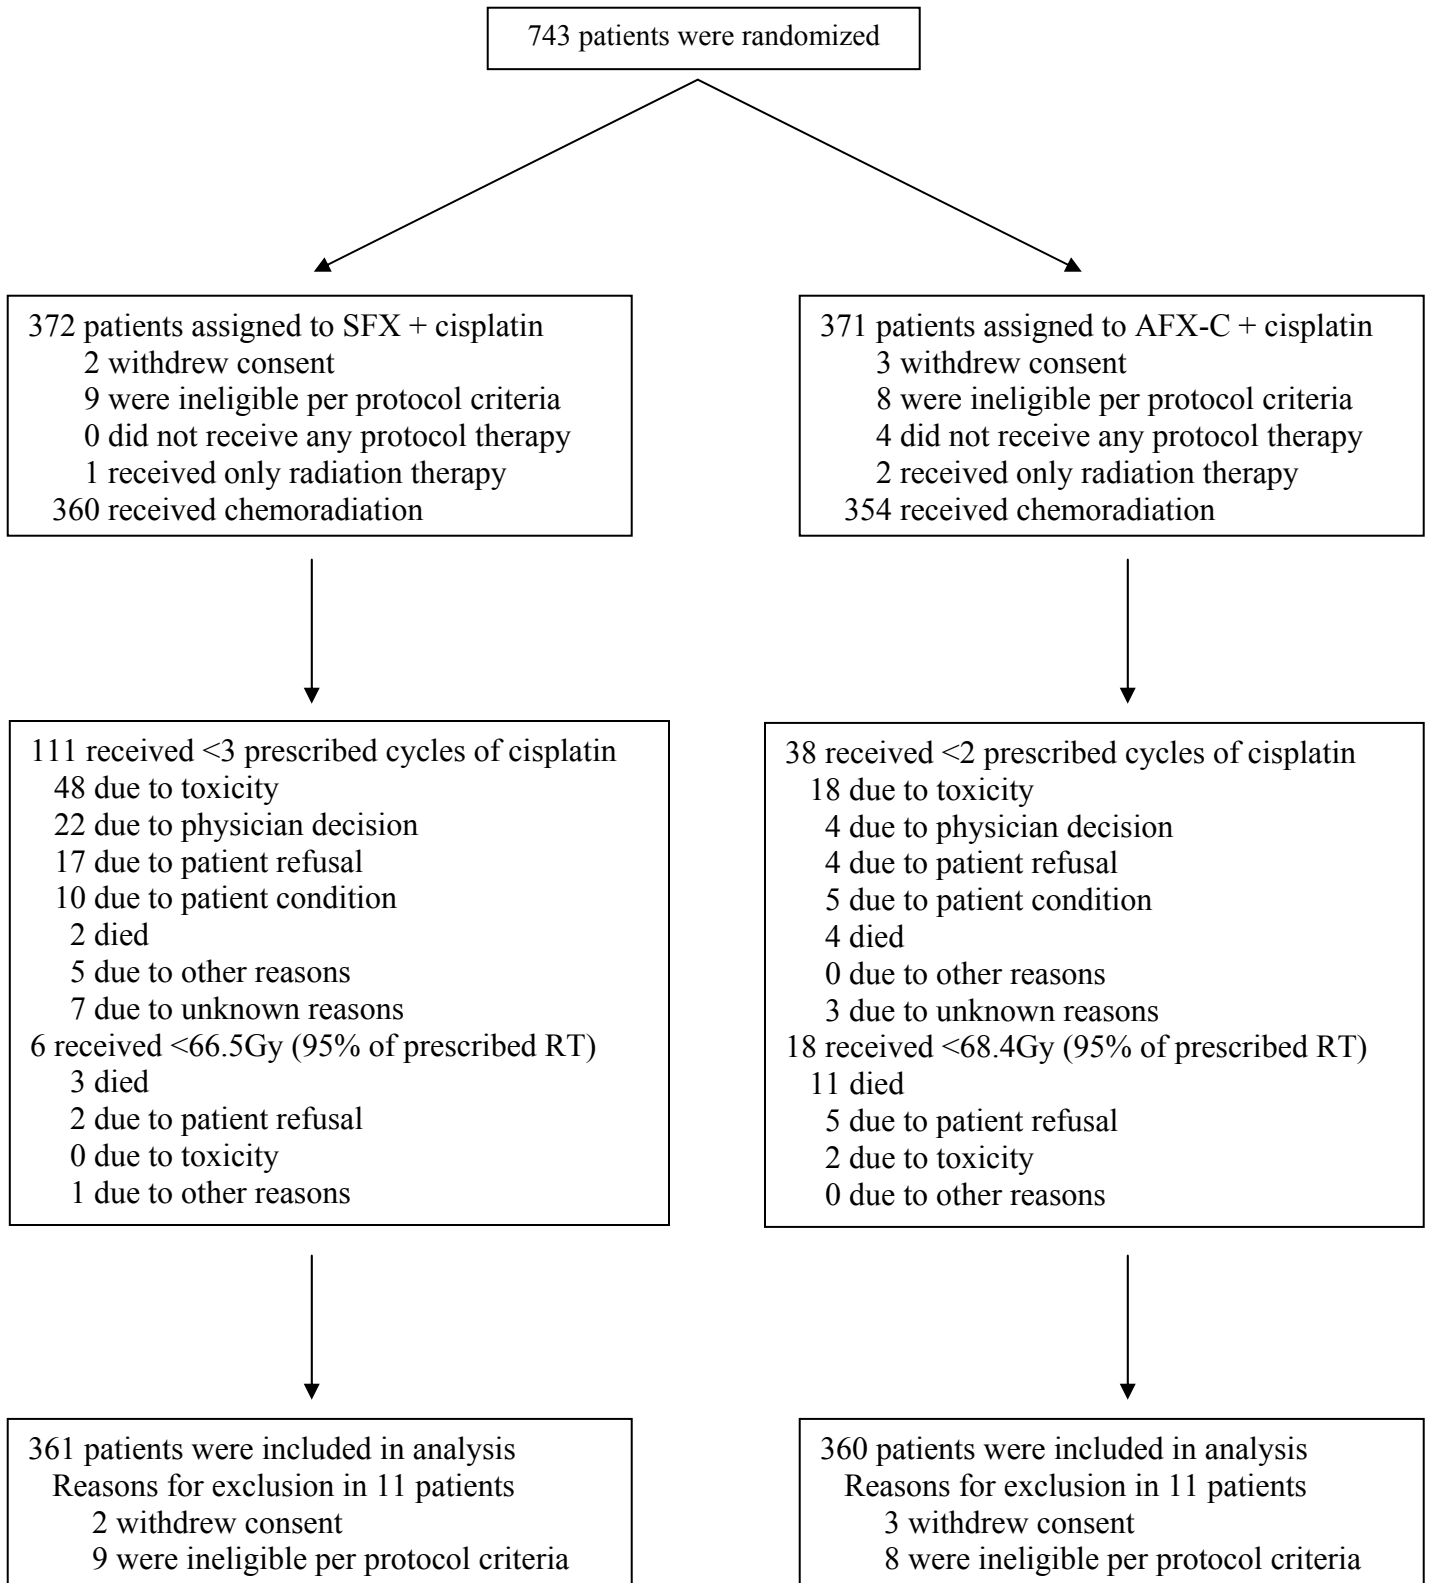

**Supplemental Table 1. Patient and Tumor Characteristics by HPV Determination for Patients with an Oropharynx Primary.**

|                           | With HPV<br>Determination<br>(n=323) | Without HPV<br>Determination<br>(n=110) | p-value  |
|---------------------------|--------------------------------------|-----------------------------------------|----------|
| Treatment Assignment      |                                      |                                         | 0.39 [1] |
| SFX + cisplatin           | 165 (51.1%)                          | 51 (46.4%)                              |          |
| AFX-C + cisplatin         | 158 (48.9%)                          | 59 (53.6%)                              |          |
| Age                       |                                      |                                         | 0.12 [2] |
| Median                    | 55                                   | 56.5                                    |          |
| Range                     | 31 - 82                              | 36 - 77                                 |          |
| Gender                    |                                      |                                         | 0.54 [1] |
| Male                      | 271 (83.9%)                          | 95 (86.4%)                              |          |
| Female                    | 52 (16.1%)                           | 15 (13.6%)                              |          |
| Race                      |                                      |                                         | 0.28 [1] |
| White                     | 278 (86.1%)                          | 90 (81.8%)                              |          |
| Non-White                 | 45 (13.9%)                           | 20 (18.2%)                              |          |
| Zubrod Performance Status |                                      |                                         | 0.20 [1] |
| 0                         | 207 (64.1%)                          | 63 (57.3%)                              |          |
| 1                         | 116 (35.9%)                          | 47 (42.7%)                              |          |
| Anemia                    |                                      |                                         | 0.66 [1] |
| No                        | 236 (73.1%)                          | 78 (70.9%)                              |          |
| Yes                       | 87 (26.9%)                           | 32 (29.1%)                              |          |
| T Stage                   |                                      |                                         | 0.26 [3] |
| T2                        | 99 (30.7%)                           | 30 (27.3%)                              |          |
| T3                        | 127 (39.3%)                          | 40 (36.4%)                              |          |
| T4                        | 97 (30.0%)                           | 40 (36.4%)                              |          |
| N Stage                   |                                      |                                         | 0.40 [3] |
| N0                        | 24 (7.4%)                            | 13 (11.8%)                              |          |
| N1                        | 46 (14.2%)                           | 10 (9.1%)                               |          |
| N2a                       | 37 (11.5%)                           | 9 (8.2%)                                |          |
| N2b                       | 107 (33.1%)                          | 32 (29.1%)                              |          |
| N2c                       | 78 (24.1%)                           | 37 (33.6%)                              |          |
| N3                        | 31 (9.6%)                            | 9 (8.2%)                                |          |
| AJCC Stage                |                                      |                                         | 0.32 [1] |
| III                       | 44 (13.6%)                           | 11 (10.0%)                              |          |
| IV                        | 279 (86.4%)                          | 99 (90.0%)                              |          |
| Smoking History           |                                      |                                         | 0.65 [1] |
| Never smoked              | 73 (22.6%)                           | 19 (17.3%)                              |          |
| Former smoker             | 164 (50.8%)                          | 57 (51.8%)                              |          |
| Current smoker            | 56 (17.3%)                           | 22 (20.0%)                              |          |
| Unknown                   | 30 (9.3%)                            | 12 (10.9%)                              |          |

|            | With HPV<br>Determination<br>(n=323) | Without HPV<br>Determination<br>(n=110) | p-value  |
|------------|--------------------------------------|-----------------------------------------|----------|
| Pack Years |                                      |                                         | 0.18 [2] |
| Median     | 20                                   | 30                                      |          |
| Range      | 0 - 152                              | 0 - 110                                 |          |

HPV = human papillomavirus.

SFX = standard fractionation radiotherapy.

AFX-C = accelerated fractionation with concomitant boost radiotherapy.

AJCC = American Joint Committee on Cancer.

[1] Pearson Chi-Square test.

[2] Kolmogorov-Smirnov test.

[3] Kruskal-Wallis test.

Anemia is defined as hemoglobin  $\leq$  13.5 for males and  $\leq$  12.5 for females.

A pack year is defined as the equivalent of smoking one pack of cigarettes per day for one year.

Pack years are missing for 57 (17.6%) and 23 (20.9%) patients with and without HPV determination.

## Supplemental Figure 2

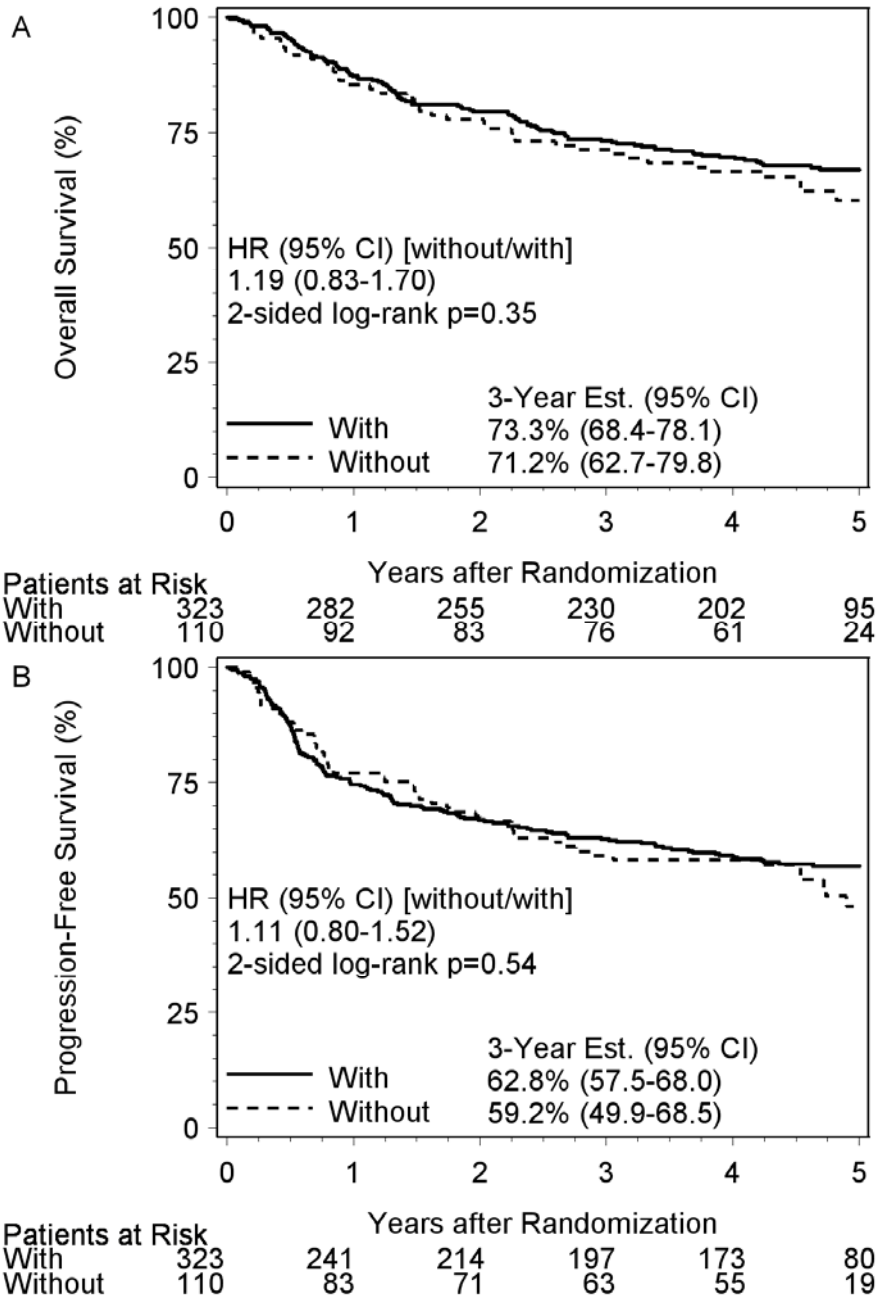

Supplemental Figure 3

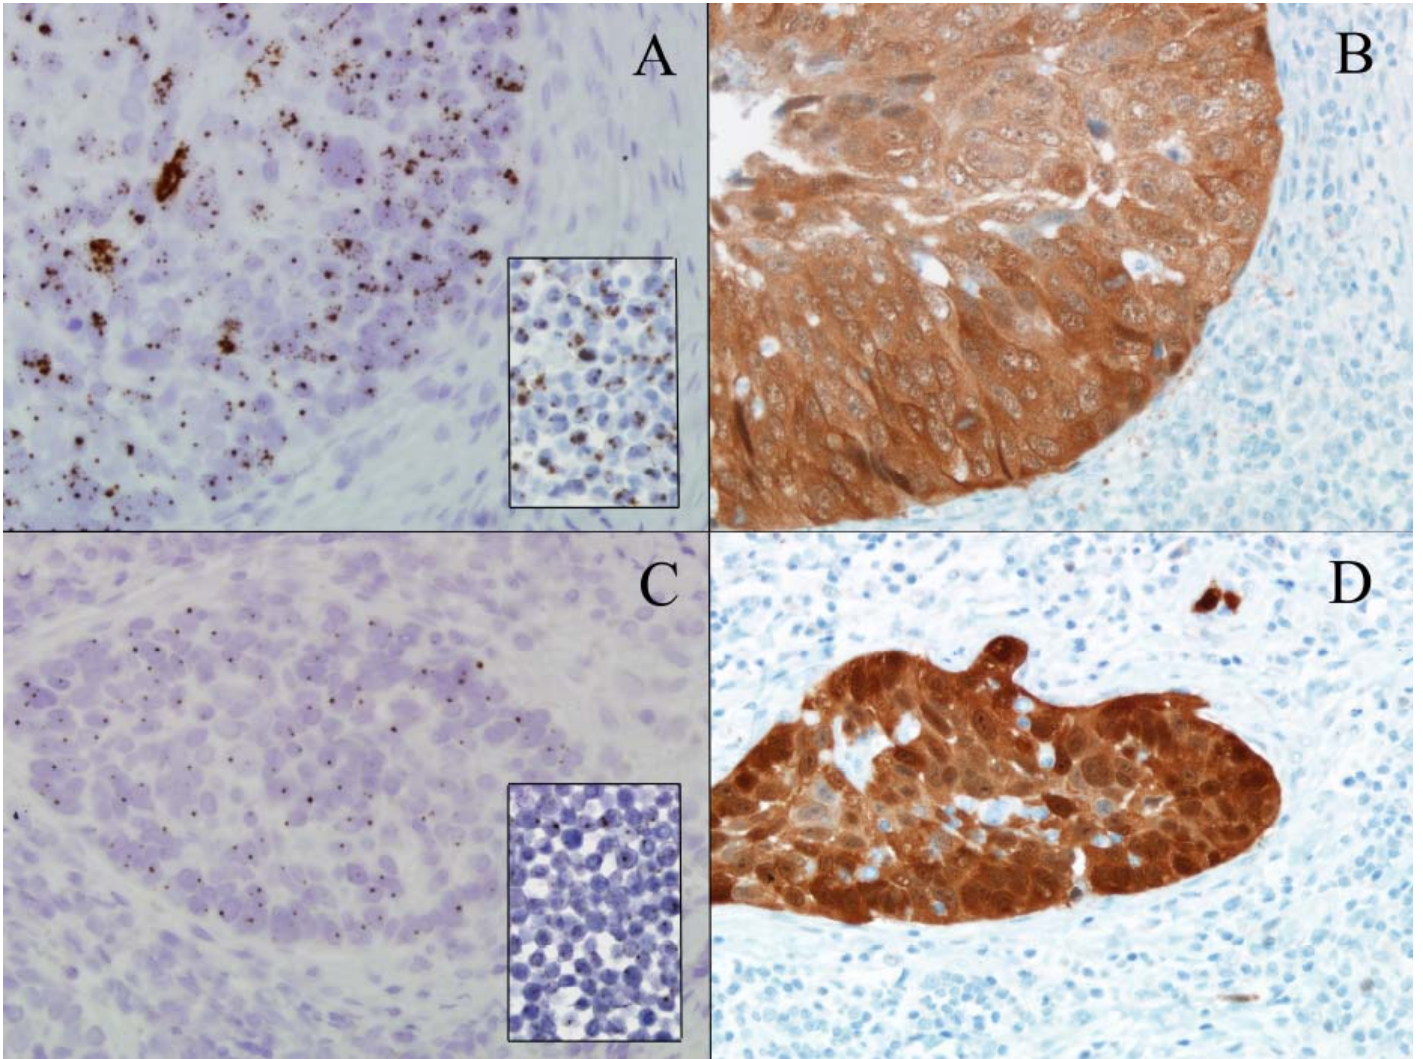

**Supplemental Table 2. Treatment Delivery by Assigned Treatment and HPV Status.**

|                                         | All Patients             |                            | Oropharynx Only<br>With HPV Determination |                         |
|-----------------------------------------|--------------------------|----------------------------|-------------------------------------------|-------------------------|
|                                         | SFX+cisplatin<br>(n=361) | AFX-C+cisplatin<br>(n=360) | HPV Positive<br>(n=206)                   | HPV Negative<br>(n=117) |
| <b>RT Dose Delivered (Gy)</b>           |                          |                            |                                           |                         |
| ≥ 95% of protocol dose                  | 355 (98.3%)              | 338 (93.9%)                | 199 (96.6%)                               | 115 (98.3%)             |
| ≥ 90, < 95% of protocol dose            | 1 (0.3%)                 | 1 (0.3%)                   | 1 (0.5%)                                  | 0 (0.0%)                |
| < 90% of protocol dose                  | 5 (1.4%)                 | 17 (4.7%)                  | 5 (2.4%)                                  | 2 (1.7%)                |
| No RT given                             | 0 (0.0%)                 | 4 (1.1%)                   | 1 (0.5%)                                  | 0 (0.0%)                |
| <b>Twice-a-day (BID) RT</b>             |                          |                            |                                           |                         |
| RT included BID                         | 1 (0.3%)                 | 348 (96.7%)                | 99 (48.1%)                                | 57 (48.7%)              |
| RT did not include BID                  | 357 (98.9%)              | 8 (2.2%)                   | 106 (51.5%)                               | 60 (51.3%)              |
| No RT given                             | 0 (0.0%)                 | 4 (1.1%)                   | 1 (0.5%)                                  | 0 (0.0%)                |
| RT not evaluable                        | 3 (0.8%)                 | 0 (0.0%)                   | 0 (0.0%)                                  | 0 (0.0%)                |
| <b>Days BID RT Missed</b>               |                          |                            |                                           |                         |
| 0                                       | 358 (99.2%)              | 266 (73.9%)                | 184 (89.3%)                               | 105 (89.7%)             |
| 1-5                                     | 0 (0.0%)                 | 71 (19.7%)                 | 18 (8.7%)                                 | 10 (8.5%)               |
| >5                                      | 0 (0.0%)                 | 19 (5.3%)                  | 3 (1.5%)                                  | 2 (1.7%)                |
| No RT given                             | 0 (0.0%)                 | 4 (1.1%)                   | 1 (0.5%)                                  | 0 (0.0%)                |
| RT not evaluable                        | 3 (0.8%)                 | 0 (0.0%)                   | 0 (0.0%)                                  | 0 (0.0%)                |
| <b>RT Elapsed Days</b>                  |                          |                            |                                           |                         |
| < per protocol                          | 14 (3.9%)                | 20 (5.6%)                  | 11 (5.3%)                                 | 4 (3.4%)                |
| Per protocol + 0-7                      | 291 (80.6%)              | 300 (83.3%)                | 178 (86.4%)                               | 100 (85.5%)             |
| Per protocol + 8-14                     | 35 (9.7%)                | 28 (7.8%)                  | 12 (5.8%)                                 | 10 (8.5%)               |
| Per protocol + 15 or more               | 21 (5.8%)                | 8 (2.2%)                   | 4 (1.9%)                                  | 3 (2.6%)                |
| No RT given                             | 0 (0.0%)                 | 4 (1.1%)                   | 1 (0.5%)                                  | 0 (0.0%)                |
| <b>Cisplatin Delivery</b>               |                          |                            |                                           |                         |
| Per protocol                            | 184 (51.0%)              | 225 (62.5%)                | 113 (54.9%)                               | 67 (57.3%)              |
| Variable, acceptable                    | 128 (35.5%)              | 110 (30.6%)                | 72 (35.0%)                                | 37 (31.6%)              |
| Deviation, unacceptable                 | 10 (2.8%)                | 3 (0.8%)                   | 3 (1.5%)                                  | 3 (2.6%)                |
| Incomplete chemotherapy                 | 35 (9.7%)                | 13 (3.6%)                  | 16 (7.8%)                                 | 7 (6.0%)                |
| No chemotherapy given                   | 1 (0.3%)                 | 6 (1.7%)                   | 1 (0.5%)                                  | 0 (0.0%)                |
| Not evaluable                           | 3 (0.8%)                 | 3 (0.8%)                   | 1 (0.5%)                                  | 3 (2.6%)                |
| <b>Cisplatin Cycles Delivered</b>       |                          |                            |                                           |                         |
| 0                                       | 1 (0.3%)                 | 6 (1.7%)                   | 1 (0.5%)                                  | 1 (0.9%)                |
| 1                                       | 25 (6.9%)                | 38 (10.6%)                 | 10 (4.9%)                                 | 11 (9.4%)               |
| 2                                       | 86 (23.8%)               | 316 (87.8%)                | 125 (60.7%)                               | 66 (56.4%)              |
| 3                                       | 249 (69.0%)              | 0 (0.0%)                   | 70 (34.0%)                                | 39 (33.3%)              |
| <b>Cisplatin Dose Delivered (mg/m2)</b> |                          |                            |                                           |                         |
| ≥ 200                                   | 304 (84.2%)              | 225 (62.5%)                | 148 (71.8%)                               | 84 (71.8%)              |
| ≥ 100, < 200 [1]                        | 53 (14.7%)               | 120 (33.3%)                | 56 (27.2%)                                | 30 (25.6%)              |
| < 100                                   | 3 (0.8%)                 | 9 (2.5%)                   | 1 (0.5%)                                  | 2 (1.7%)                |
| No chemotherapy given                   | 1 (0.3%)                 | 6 (1.7%)                   | 1 (0.5%)                                  | 1 (0.9%)                |
| Min                                     | 0.0                      | 0.0                        | 0.0                                       | 0.0                     |
| Q1                                      | 200.0                    | 195.8                      | 199.1                                     | 199.1                   |



|        | All Patients             |                            | Oropharynx Only<br>With HPV Determination |                         |
|--------|--------------------------|----------------------------|-------------------------------------------|-------------------------|
|        | SFX+cisplatin<br>(n=361) | AFX-C+cisplatin<br>(n=360) | HPV Positive<br>(n=206)                   | HPV Negative<br>(n=117) |
| Median | 298.4                    | 200.0                      | 200.0                                     | 200.0                   |
| Q3     | 300.0                    | 200.0                      | 297.2                                     | 289.6                   |
| Max    | 309.4                    | 207.1                      | 308.4                                     | 302.5                   |

HPV = human papillomavirus.

SFX = standard fractionation radiotherapy.

AFX-C = accelerated fractionation with concomitant boost radiotherapy.

SFX: 70 Gy in 7 weeks and 3 cycles of cisplatin (100 mg/m<sup>2</sup>) on days 1, 22, and 43.

AFX-C: 72 Gy in 6 weeks and 2 cycles of cisplatin (100 mg/m<sup>2</sup>) on days 1 and 22.

RT = radiation therapy.

Q1 = first quartile.

Q3 = third quartile.

[1] For patients receiving  $\geq 100$  but  $< 200$  mg/m<sup>2</sup> of cisplatin, the median dose was 159.1 for SFX patients and 188.1 for AFX-C patients.

**Supplemental Table 3. Toxicity and Feeding Tube Use by Assigned Treatment.**

|                                             | SFX+cisplatin    |      |            | AFX-C+cisplatin  |      |            | p-value [1] |
|---------------------------------------------|------------------|------|------------|------------------|------|------------|-------------|
|                                             | Number/<br>Total | %    | 95% CI     | Number/<br>Total | %    | 95% CI     |             |
| <b>Deaths</b>                               |                  |      |            |                  |      |            |             |
| Within 30 days of treatment end, any cause  | 7/361            | 1.9  | 0.5, 3.4   | 12/360           | 3.3  | 1.5, 5.2   | 0.26        |
| Grade 5 toxicity [2]                        | 2/361            | 0.6  | 0.0, 1.3   | 3/360            | 0.8  | 0.0, 1.8   | 0.69        |
| <b>Grade 3-4 CTC Toxicities</b>             |                  |      |            |                  |      |            |             |
| Neutropenia                                 | 96/361           | 26.6 | 22.0, 31.2 | 74/360           | 20.6 | 16.4, 24.7 | 0.07        |
| Infection febrile neutropenia               | 34/361           | 9.4  | 6.4, 12.4  | 37/360           | 10.3 | 7.1, 13.4  | 0.71        |
| Other hematologic                           | 143/361          | 39.6 | 34.6, 44.7 | 111/360          | 30.8 | 26.1, 35.6 | 0.02        |
| Metabolic/laboratory                        | 83/361           | 23.0 | 18.7, 27.3 | 60/360           | 16.7 | 12.8, 20.5 | 0.04        |
| Renal/genitourinary                         | 22/361           | 6.1  | 3.6, 8.6   | 13/360           | 3.6  | 1.7, 5.5   | 0.16        |
| Auditory/hearing                            | 10/361           | 2.8  | 1.1, 4.5   | 6/360            | 1.7  | 0.3, 3.0   | 0.45        |
| Dermatology/skin                            | 31/361           | 8.6  | 5.7, 11.5  | 35/360           | 9.7  | 6.7, 12.8  | 0.61        |
| Mucositis/stomatitis                        | 143/361          | 39.6 | 34.6, 44.7 | 119/360          | 33.1 | 28.2, 37.9 | 0.07        |
| Other gastrointestinal                      | 189/361          | 52.4 | 47.2, 57.5 | 187/360          | 51.9 | 46.8, 57.1 | 0.94        |
| All others                                  | 100/361          | 27.7 | 23.1, 32.3 | 90/360           | 25.0 | 20.5, 29.5 | 0.45        |
| Overall                                     | 302/361          | 83.7 | 79.8, 87.5 | 288/360          | 80.0 | 75.9, 84.1 | 0.21        |
| <b>Grade 3-4 Late RTOG/EORTC Toxicities</b> |                  |      |            |                  |      |            |             |
| Mucous membrane                             | 5/351            | 1.4  | 0.2, 2.7   | 14/343           | 4.1  | 2.0, 6.2   | 0.04        |
| Esophagus                                   | 25/351           | 7.1  | 4.4, 9.8   | 33/343           | 9.6  | 6.5, 12.7  | 0.27        |
| Larynx                                      | 13/351           | 3.7  | 1.7, 5.7   | 15/343           | 4.4  | 2.2, 6.5   | 0.70        |
| Salivary gland                              | 13/351           | 3.7  | 1.7, 5.7   | 18/343           | 5.2  | 2.9, 7.6   | 0.36        |
| Skin                                        | 5/351            | 1.4  | 0.2, 2.7   | 2/343            | 0.6  | 0.0, 1.4   | 0.45        |
| Subcutaneous tissue                         | 9/351            | 2.6  | 0.9, 4.2   | 8/343            | 2.3  | 0.7, 3.9   | 1.00        |
| Bone                                        | 10/351           | 2.8  | 1.1, 4.6   | 15/343           | 4.4  | 2.2, 6.5   | 0.31        |
| All others                                  | 32/351           | 9.1  | 6.1, 12.1  | 29/343           | 8.5  | 5.5, 11.4  | 0.79        |
| Overall                                     | 74/351           | 21.1 | 16.8, 25.3 | 88/343           | 25.7 | 21.0, 30.3 | 0.18        |
| <b>Nutritional Support via Feeding Tube</b> |                  |      |            |                  |      |            |             |
| Pretreatment                                | 89/361           | 24.7 | 20.2, 29.1 | 79/360           | 21.9 | 17.7, 26.2 | 0.43        |
| End of treatment                            | 248/361          | 68.7 | 63.9, 73.5 | 239/356          | 67.1 | 62.3, 72.0 | 0.80        |
| 1 year from start of treatment              | 88/301           | 29.2 | 24.1, 34.4 | 84/302           | 27.8 | 22.8, 32.9 | 0.72        |
| 2 years from start of treatment             | 28/242           | 11.6 | 7.5, 15.6  | 38/242           | 15.7 | 11.1, 20.3 | 0.23        |
| 3 years from start of treatment             | 16/192           | 8.3  | 4.4, 12.2  | 20/199           | 10.1 | 5.9, 14.2  | 0.60        |

SFX = standard fractionation radiotherapy.

AFX-C = accelerated fractionation with concomitant boost radiotherapy.

CI = confidence interval.

CTC = Common Toxicity Criteria, version 2.0.

RTOG = Radiation Therapy Oncology Group.

EORTC = European Organisation for Research and Treatment of Cancer.

[1] Fisher's exact test.

[2] SFX: 1-hyponatremia, 1-hemorrhage; AFX-C: 2-febrile neutropenia; 1-hemorrhagic stroke.

**Supplemental Table 4. Survival Estimates, Causes of Death, and Patterns of Failure by Assigned Treatment.**

|                                  | SFX + cisplatin<br>(n=361) | AFX-C + cisplatin<br>(n=360) | p-value    |
|----------------------------------|----------------------------|------------------------------|------------|
| Overall Survival                 |                            |                              | 0.18 [1]   |
| 3-year estimate (95% CI)         | 64.3% (59.3-69.2)          | 70.3% (65.6-75.1)            |            |
| Cause of Death                   | (n=157)                    | (n=146)                      | 0.54 [2]   |
| Index cancer                     | 97 (61.8%)                 | 80 (54.8%)                   |            |
| Second primary tumor             | 12 (7.6%)                  | 11 (7.5%)                    |            |
| Protocol treatment               | 2 (1.3%)                   | 3 (2.1%)                     |            |
| Non-protocol treatment           | 2 (1.3%)                   | 1 (0.7%)                     |            |
| Unrelated to cancer or treatment | 22 (14.0%)                 | 22 (15.1%)                   |            |
| Unknown                          | 22 (14.0%)                 | 29 (19.9%)                   |            |
| Progression-Free Survival        |                            |                              | 0.50 [1]   |
| 3-year estimate (95% CI)         | 55.8% (50.6-60.9)          | 57.0% (51.8-62.1)            |            |
| Local-Regional Failure           |                            |                              | 0.80 [3]   |
| 3-year estimate (95% CI)         | 25.6% (21.1-30.1)          | 28.2% (23.6-32.9)            |            |
| Distant Metastasis               |                            |                              | 0.14 [3]   |
| 3-year estimate (95% CI)         | 13.1% (9.6-16.6)           | 10.4% (7.2-13.5)             |            |
| Site of First Failure            | (n=183)                    | (n=182)                      | 0.42 [4]   |
| Local-regional                   | 70 (38.3%)                 | 80 (44.0%)                   |            |
| Distant metastasis               | 52 (28.4%)                 | 42 (23.1%)                   |            |
| Dead, no documented progression  | 61 (33.3%)                 | 60 (33.0%)                   |            |
| Second Primary Tumor             |                            |                              | 0.99 [5]   |
| 3-year estimate (95% CI)         | 9.2% (6.2-12.2)            | 9.0% (6.0-12.0)              |            |
| Site of Second Primary Tumor     | (n=45)                     | (n=45)                       | <0.001 [6] |
| Head & Neck                      | 7 (15.6%)                  | 9 (20.0%)                    |            |
| Lung                             | 21 (46.7%)                 | 22 (48.9%)                   |            |
| Esophagus                        | 2 (4.4%)                   | 1 (2.2%)                     |            |
| Bladder                          | 1 (2.2%)                   | 0 (0.0%)                     |            |
| Cervix                           | 1 (2.2%)                   | 0 (0.0%)                     |            |
| Prostate                         | 2 (4.4%)                   | 3 (6.7%)                     |            |
| Colon                            | 2 (4.4%)                   | 0 (0.0%)                     |            |
| Rectum                           | 1 (2.2%)                   | 1 (2.2%)                     |            |
| Kidney                           | 1 (2.2%)                   | 1 (2.2%)                     |            |
| Cecum                            | 0 (0.0%)                   | 1 (2.2%)                     |            |
| Peritoneum                       | 1 (2.2%)                   | 0 (0.0%)                     |            |
| Breast                           | 0 (0.0%)                   | 2 (4.4%)                     |            |
| Skin                             | 4 (8.9%)                   | 4 (8.9%)                     |            |
| Unknown                          | 2 (4.4%)                   | 1 (2.2%)                     |            |

|                                                                                                          | SFX + cisplatin<br>(n=361) | AFX-C + cisplatin<br>(n=360) | p-value |
|----------------------------------------------------------------------------------------------------------|----------------------------|------------------------------|---------|
| SFX = standard fractionation radiotherapy.                                                               |                            |                              |         |
| AFX-C = accelerated fractionation with concomitant boost radiotherapy.                                   |                            |                              |         |
| CI = confidence interval.                                                                                |                            |                              |         |
| [1] 1-sided Log-Rank test.                                                                               |                            |                              |         |
| [2] Pearson Chi-Square test; index cancer, protocol treatment, and non-protocol treatment were combined. |                            |                              |         |
| [3] 1-sided Gray's test.                                                                                 |                            |                              |         |
| [4] Pearson Chi-Square test.                                                                             |                            |                              |         |
| [5] 2-sided Gray's test.                                                                                 |                            |                              |         |
| [6] Pearson Chi-Square test; smoking-related cancers (head & neck, lung) vs. others.                     |                            |                              |         |

Supplemental Figure 4

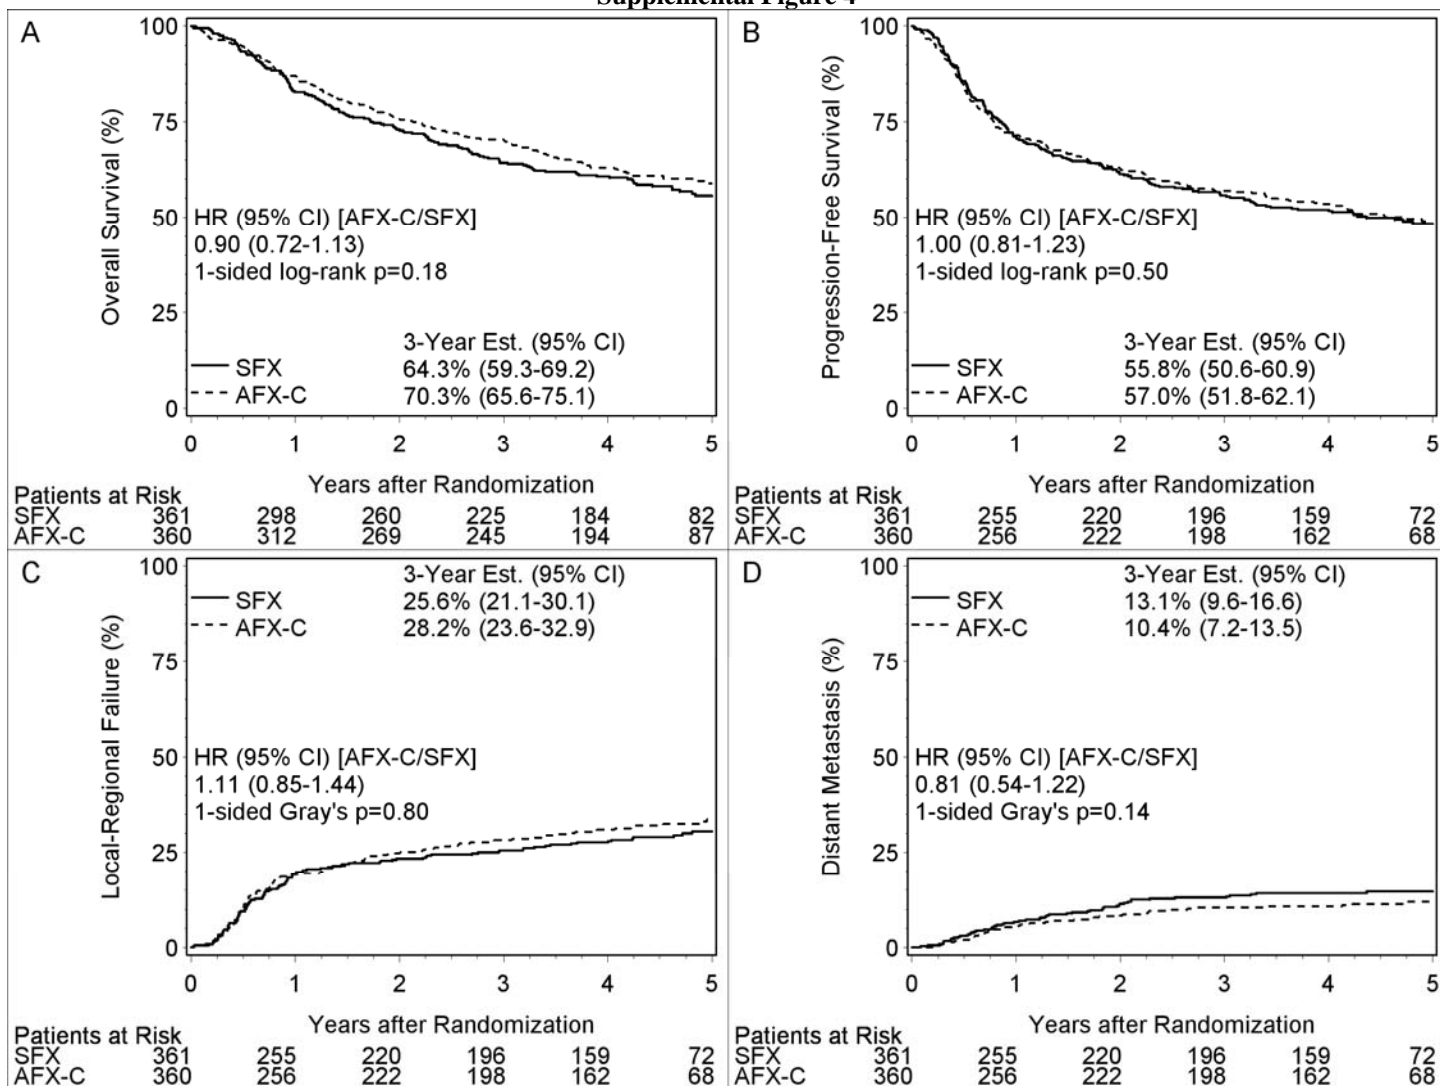

Supplement: NIHMS222650-supplement-Supplement1.pdf [file NIHMS222650-supplement-Supplement1.pdf]
